# Supplementary material for: Comparing and Evaluating Metagenome Assembly Tools from a Microbiologist’s Perspective - Not Only Size Matters!
Source: PubMed Central journal article supplement (PMC5242441; doi:10.1371/journal.pone.0169662), 2017-01-18
Supplement: pone.0169662.s004.pdf [file pone.0169662.s004.pdf]

**S1 Table. Development of sequencing technologies over time [1–6].**

| Time frame                   | <2005                              | 2005                       | 2008                       | 2010                    | 2011                       | 2011                  | 2011                       | 2011                                        | 2012                       | 2012                         | 2013                  | 2013                                                              | 2013                                        | 2015                             | Future                             |
|------------------------------|------------------------------------|----------------------------|----------------------------|-------------------------|----------------------------|-----------------------|----------------------------|---------------------------------------------|----------------------------|------------------------------|-----------------------|-------------------------------------------------------------------|---------------------------------------------|----------------------------------|------------------------------------|
| <b>Sequencing technology</b> | Sanger (ABIXXX) [2]                | 454 GS20 [3]               | 454 GS FLX Titanium [3]    | Illumina Hiseq 1000 [4] | 454 GS FLX+ [3]            | Illumina Miseq [4]    | Ion Torrent PGM [2]        | PacBio RS [5]                               | Ion Torrent PGM [2]        | Illumina Hiseq 2000/2500 [4] | Illumina Miseq v3 [4] | TruSeq Synthetic Long-Reads (Moleculo) [4]                        | PacBio RS II [5]                            | Illumina Hiseq 3000/4000 [4]     | Oxford nanopore MiniON [6]         |
| <b>Read length [bp]</b>      | 800-1200                           | 100                        | ~400                       | 100                     | ~700                       | 150                   | 50-100                     | 5000-9000                                   | 400                        | 100-150                      | 300                   | ~10,000                                                           | 15,000                                      | 150                              | >10,000                            |
| <b>Technique</b>             | PCR                                | Emulsion PCR amplification | Emulsion PCR amplification | Cluster amplification   | Emulsion PCR amplification | Cluster amplification | Emulsion PCR amplification | Single molecule real-time sequencing (SMRT) | Emulsion PCR amplification | Cluster amplification        | Cluster amplification | Labelled sublibraries, cluster amplification & local pre-assembly | Single molecule real-time sequencing (SMRT) | Normalized cluster amplification | Single molecule nanopore threading |
| <b>Output per run</b>        | 96 Kb                              | 20 Mb                      | ~400 Mb                    | 300 Gb                  | ~700 Mb                    | 2Gb                   | 100-200 Mb                 | 100 Mb per SMRT cell                        | >1Gb                       | 600-1000 Gb                  | 15 Gb                 | >600 Mb long read data per library & lane (+)                     | 1 Gb per SMRT cell                          | 750-1500 Gb                      | NA                                 |
| <b>Costs per Mb</b>          | \$2400                             | \$166                      | \$12                       | \$0.04                  | \$9                        | \$0.50                | \$0.70                     | \$2                                         | \$1                        | \$0.04                       | \$0.08                | <\$1.4 (+)                                                        | \$0.60                                      | NA                               | NA                                 |
| <b>Time per run</b>          | 12h                                | 24h                        | 24h                        | 9 days                  | 24h                        | 20-36 h               | 3h                         | 2h                                          | 4 h                        | 4-11 days                    | 20-36 h               | ~2-6 days (+)                                                     | 4 h                                         | 4 days                           | NA                                 |
| <b>Problems/ pitfalls</b>    | Cloning bias for shotgun libraries | Homopolymer stretches      | Homopolymer stretches      | GGCxG motifs            | Homopolymer stretches      | GGCxG motifs          | Homopolymer stretches      | High random error rates                     | Homopolymer stretches      | GGCxG motifs                 | GGCxG motifs          | Local pre-assembly breaks at repeats                              | Quite high random error rate                | GGCxG motifs                     | High random error rates            |

(+) Depends on sequencing machine and size of target genome

**References:**

1. El-Metwally S, Ouda O, Helmy M. Next Generation Sequencing Technologies and Challenges in Sequence Assembly. New York Heidelberg Dordrecht London: Springer; 2014. doi:10.1007/978-1-4939-0715-1
2. <https://www.thermofisher.com>.
3. <http://www.454.com>.
4. <http://www.illumina.com>.
5. <http://www.pacb.com>.
6. <https://www.nanoporetech.com>.
