# Supplementary material for: Comparing and Evaluating Metagenome Assembly Tools from a Microbiologist’s Perspective - Not Only Size Matters!
Source: PubMed Central journal article supplement (PMC5242441; doi:10.1371/journal.pone.0169662), 2017-01-18
Supplement: pone.0169662.s009.pdf [file pone.0169662.s009.pdf]

S6 Table. Non-exhaustive list of helpful and informative weblinks

| Name                        | Weblink                                                                                      | Source                                            | Description                                                                                                                                                                                                                                |
|-----------------------------|----------------------------------------------------------------------------------------------|---------------------------------------------------|--------------------------------------------------------------------------------------------------------------------------------------------------------------------------------------------------------------------------------------------|
| Living in an Ivory Basement | <a href="http://ivory.idyll.org">ivory.idyll.org</a>                                         | C. Titus Brown, University of California Davis    | Stochastic thoughts on science, testing, and programming.                                                                                                                                                                                  |
| The Tree of Life            | <a href="http://phylogenomics.blogspot.de">phylogenomics.blogspot.de</a>                     | Jonathan A. Eisen, University of California Davis | Jonathan Eisen's Blog, The Tree of Life                                                                                                                                                                                                    |
| Homolog.us                  | <a href="http://homolog.us">homolog.us</a>                                                   |                                                   | Nice blog and online knowledge-base on transcriptomics, bioinformatics and computational biology with a very useful tutorials section.                                                                                                     |
| BitesizeBio                 | <a href="http://bitesizebio.com">bitesizebio.com</a>                                         |                                                   | A community driven blog, offering articles on various topics in biology and bioinformatics.                                                                                                                                                |
| Langmead lab                | <a href="http://langmead-lab.org/teaching-materials">langmead-lab.org/teaching-materials</a> | Ben Langmead, John Hopkins University             | Introduction to sequencing algorithms and python programming.                                                                                                                                                                              |
| Bioinformatics Web          | <a href="http://bioinformaticsweb.net">bioinformaticsweb.net</a>                             | Suresh Kumar                                      | A blog on bioinformatics.                                                                                                                                                                                                                  |
| SEQanswers                  | <a href="http://seqanswers.com">seqanswers.com</a>                                           | [1]                                               | Widely used knowledge-sharing resource and one of the leading forums of the next generation community.                                                                                                                                     |
| edX                         | <a href="http://edx.org">edx.org</a>                                                         |                                                   | Online learning resource offering free MOOC courses. Includes several helpful courses on Bioinformatics.                                                                                                                                   |
| Coursera                    | <a href="http://coursera.org">coursera.org</a>                                               |                                                   | Online learning resource offering free MOOC courses. Includes several helpful courses on Bioinformatics, such as the helpful "Algorithms for DNA Sequencing" course by Ben Langmead                                                        |
| CAMI                        | <a href="http://cami-challenge.org/">cami-challenge.org/</a>                                 |                                                   | Critical Assessment of Metagenome Interpretation. A benchmarking and comparison of metagenomic methods using standardized Mock community datasets.                                                                                         |
| MG-RAST                     | <a href="http://metagenomics.anl.gov">metagenomics.anl.gov</a>                               | [2]                                               | The MG-RAST (the Metagenomics RAST) web application server is an automated analysis platform for metagenomes. It provides quantitative insights into microbial populations based on functional and phylogenetic analyses of sequence data. |
| Qiime                       | <a href="http://qiime.org">qiime.org</a>                                                     | [3]                                               | QIIME (Quantitative Insights Into Microbial Ecology) is an open-source bioinformatics pipeline for performing microbiome analysis from raw DNA sequencing data.                                                                            |

|             |                                                                                        |        |                                                                                                                                                                                                                                                                                                |
|-------------|----------------------------------------------------------------------------------------|--------|------------------------------------------------------------------------------------------------------------------------------------------------------------------------------------------------------------------------------------------------------------------------------------------------|
| IMG         | <a href="http://img.jgi.doe.gov/cgi-bin/m">img.jgi.doe.gov/cgi-bin/m</a>               | [4][5] | The IMG (Integrated Microbial Genomes) database is a genome browsing and annotation platform. The IMG/M extension of this system provides the comparative analysis of metagenomic data.                                                                                                        |
| mothur      | <a href="http://mothur.org">mothur.org</a>                                             | [6]    | The mothur project seeks to develop a single piece of open-source, expandable software to fill the bioinformatics needs of the microbial ecology community. It is a widely used tool for the analysis of 16S rRNA gene sequences.                                                              |
| ARB         | <a href="http://arb-home.de">arb-home.de</a>                                           | [7]    | The software package ARB represents a graphically-oriented, fully-integrated package of cooperating software tools for handling and analysis of sequence information.                                                                                                                          |
| Galaxy      | <a href="http://galaxyproject.org">galaxyproject.org</a>                               | [8]    | Galaxy is an open, web-based platform enabling the creation of scientific workflows and the integration of data to make computational biology accessible to scientists that do not have programming experience.                                                                                |
| AMPHORA     | <a href="http://pitgroup.org/amphoranet">pitgroup.org/amphoranet</a>                   | [9]    | AMPHORA (AutoMated Phylogenomic infeRence Application) is an automated phylogenomic inference tool that can be used for high-throughput, high-quality genome tree reconstruction and metagenomic phylotyping of etagenomic datasets based on bacterial and archaeal phylogenetic marker genes. |
| EMBOSS      | <a href="http://emboss.sourceforge.net">emboss.sourceforge.net</a>                     | [10]   | EMBOSS (European Molecular Biology Open Software Suite) is a free Open Source software analysis package specially developed for the needs of molecular biologists. It integrates a range of currently available packages and tools for sequence analysis into a seamless whole.                |
| Bio-Linux 8 | <a href="http://environmentalomics.org/bio-linux">environmentalomics.org/bio-linux</a> | [11]   | A Linux distribution with an extensive repository of bioinformatic tools. Possibly discontinued within 2016. Future unsure.                                                                                                                                                                    |
| BioPerl     | <a href="http://bioperl.org">bioperl.org</a>                                           | [12]   | BioPerl is a collection of Perl modules for bioinformatics applications                                                                                                                                                                                                                        |
| Biopython   | <a href="http://biopython.org">biopython.org</a>                                       | [13]   | Biopython is a set of Python modules for bioinformatics applications.                                                                                                                                                                                                                          |
| BioJava     | <a href="http://biojava.org">biojava.org</a>                                           | [14]   | BioJava is a set of Java modules for bioinformatics applications                                                                                                                                                                                                                               |

1. Li J-W, Schmieder R, Ward RM, Delenick J, Olivares EC, Mittelman D. SEQanswers: an open access community for collaboratively decoding genomes. *Bioinformatics*. 2012; doi:10.1093/bioinformatics/bts128
2. Meyer F, Paarmann D, D'Souza M, Olson R, Glass EM, Kubal M, et al. The metagenomics RAST server - a public resource for the automatic phylogenetic and functional analysis of metagenomes. *BMC Bioinformatics*. 2008; doi:10.1186/1471-2105-9-386
3. Caporaso JG, Kuczynski J, Stombaugh J, Bittinger K, Bushman FD, Costello EK, et al. QIIME allows analysis of high-throughput community sequencing data. *Nat Methods*. 2010; doi:10.1038/nmeth.f.303
4. Markowitz VM, Chen I-MA, Palaniappan K, Chu K, Szeto E, Pillay M, et al. IMG 4 version of the integrated microbial genomes comparative analysis system. *Nucleic Acids Res*. 2014; doi:10.1093/nar/gkt963
5. Markowitz VM, Chen I-MA, Chu K, Szeto E, Palaniappan K, Pillay M, et al. IMG/M 4 version of the integrated metagenome comparative analysis system. *Nucleic Acids Res*. 2014; doi:10.1093/nar/gkt919
6. Schloss PD, Westcott SL, Ryabin T, Hall JR, Hartmann M, Hollister EB, et al. Introducing mothur: open-source, platform-independent, community-supported software for describing and comparing microbial communities. *Appl Env Microbiol*. 2009; doi:10.1128/AEM.01541-09
7. Ludwig W, Strunk O, Westram R, Richter L, Meier H, Yadhukumar, et al. ARB: a software environment for sequence data. *Nucleic Acids Res*. 2004; doi:10.1093/nar/gkh293
8. Giardine B, Riemer C, Hardison RC, Burhans R, Elnitski L, Shah P, et al. Galaxy: a platform for interactive large-scale genome analysis. *Genome Res*. 2005; doi:10.1101/gr.4086505
9. Kerepesi C, Bánky D, Grolmusz V. AmphoraNet: the webserver implementation of the AMPHORA2 metagenomic workflow suite. *Gene*. 2014; doi:10.1016/j.gene.2013.10.015
10. Rice P, Longden I, Bleasby A. EMBOSS: The European Molecular Biology Open Software Suite. *Trends Genet*. 2000; doi:10.1016/S0168-9525(00)02024-2
11. Field D, Tiwari B, Booth T, Houten S, Swan D, Bertrand N, et al. Open software for biologists: from famine to feast. *Nat Biotechnol*. 2006; doi:10.1038/nbt0706-801
12. Stajich JE, Block D, Boulez K, Brenner SE, Chervitz SA, Dagdigian C, et al. The Bioperl toolkit: Perl modules for the life sciences. *Genome Res*. 2002; doi:10.1101/gr.361602
13. Cock PJA, Antao T, Chang JT, Chapman BA, Cox CJ, Dalke A, et al. Biopython: freely available Python tools for computational molecular biology and bioinformatics. *Bioinformatics*. 2009; doi:10.1093/bioinformatics/btp163
14. Holland RCG, Down TA, Pocock M, Prlić A, Huen D, James K, et al. BioJava: an open-source framework for bioinformatics. *Bioinformatics*. 2008;24: 2096–7. doi:10.1093/bioinformatics/btn397
